# Supplementary material for: Differential Trafficking and Expression of PIR Proteins in Acute and Chronic Plasmodium Infections
Source: PubMed Central journal article supplement (PMC9245118; doi:10.3389/fcimb.2022.877253), 2022-06-16
Supplement: DataSheet_1.pdf [file DataSheet_1.pdf]

# A Live Cells

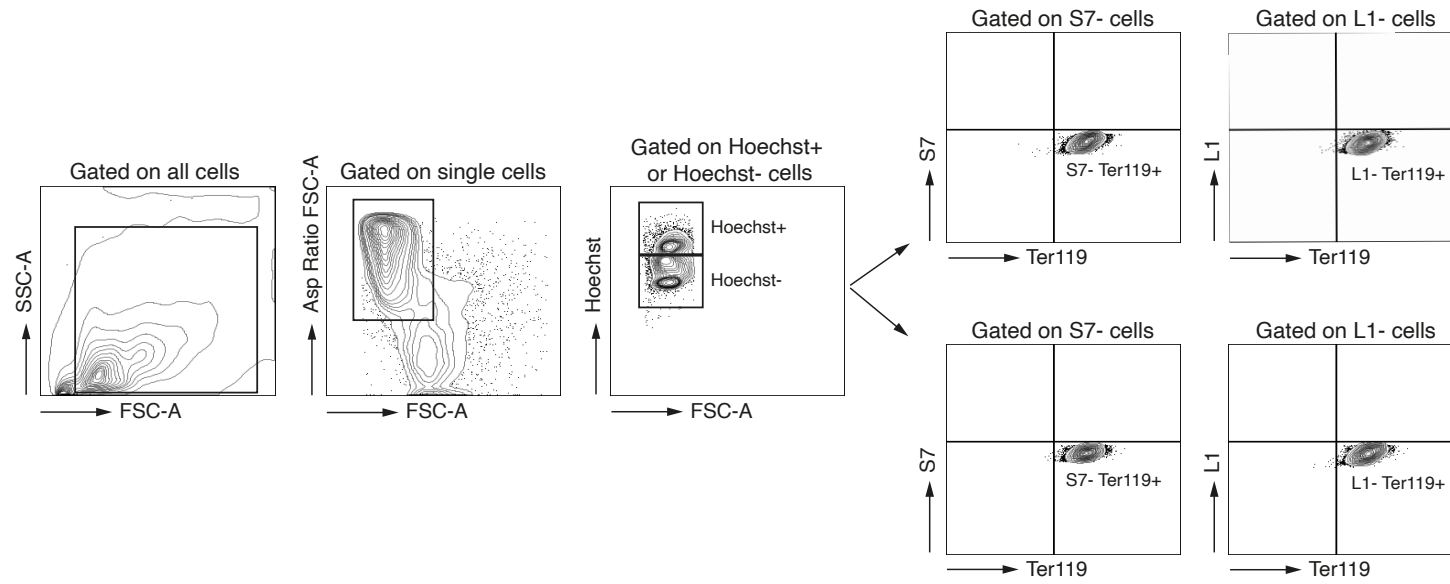

# B Fixed Cells

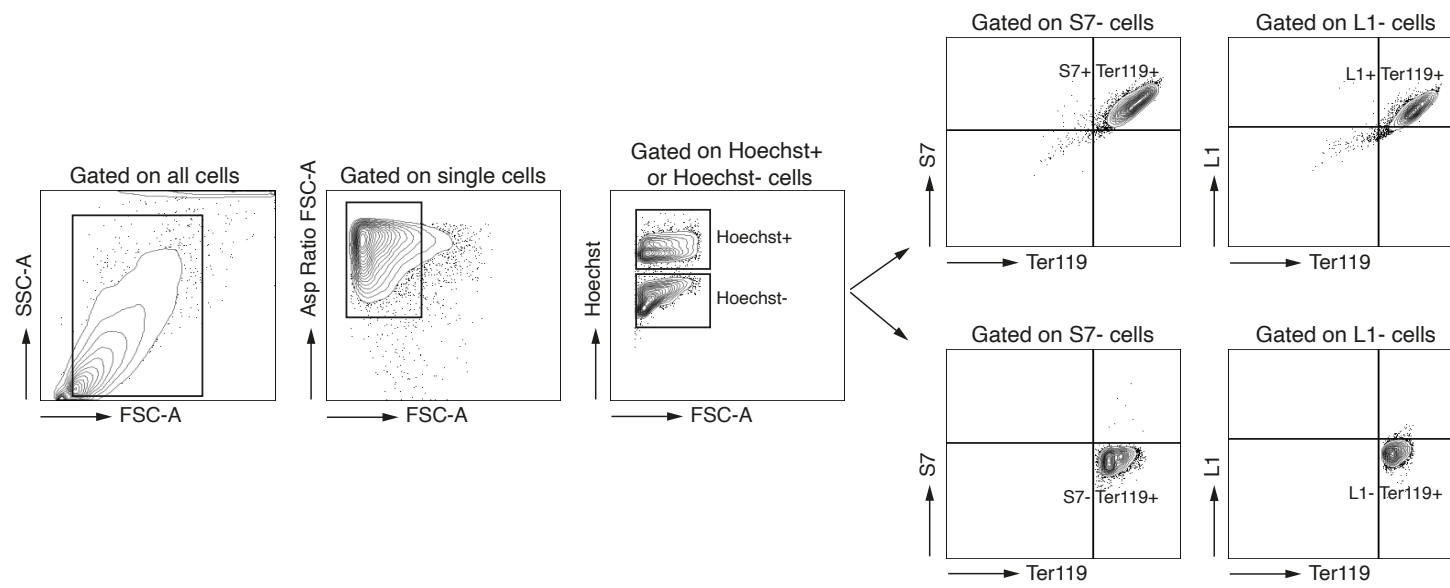

**Supplementary Figure S1. Representative flow cytometry plots describing the gating strategy followed to investigate the surface localisation of S7 or L1 PIRS in *P. c. chabaudi* AS iRBC.** Live (A) and fixed (B) iRBC from *P. chabaudi* infected C57BL/6 WT mice were labelled with the anti-S7 or anti-L1 peptide antisera and Ter119 monoclonal antibodies and analysed for mosquito transmitted parasites during the acute- and chronic-phases of infection in an Amnis® CellStream® Cytometer. Parasite DNA was stained with Hoechst 33342. Initially, the gate was set to exclude debris and include Hoechst+ iRBC based on the forward and side scatter (FSC-A/SSC-A) profile in the dot plot. The events were then viewed in an Aspect Ratio FSC-A/FSC-A profile to distinguish the singlet cells. The single cells were then gated into infected (Hoechst+) and non-infected (Hoechst-) RBC. Hoechst+ cells were then viewed in an S7 or L1/Ter119 dot plot. The S7 or L1 signal detected in Hoechst- cells was used as a control to set the baseline of the background coming from any non-specific binding of the peptide antisera. The fixative used for (A) is acetone:methanol which also permeabilises the cells; therefore fixed cells were used as a control to confirm antibody integrity.

**A**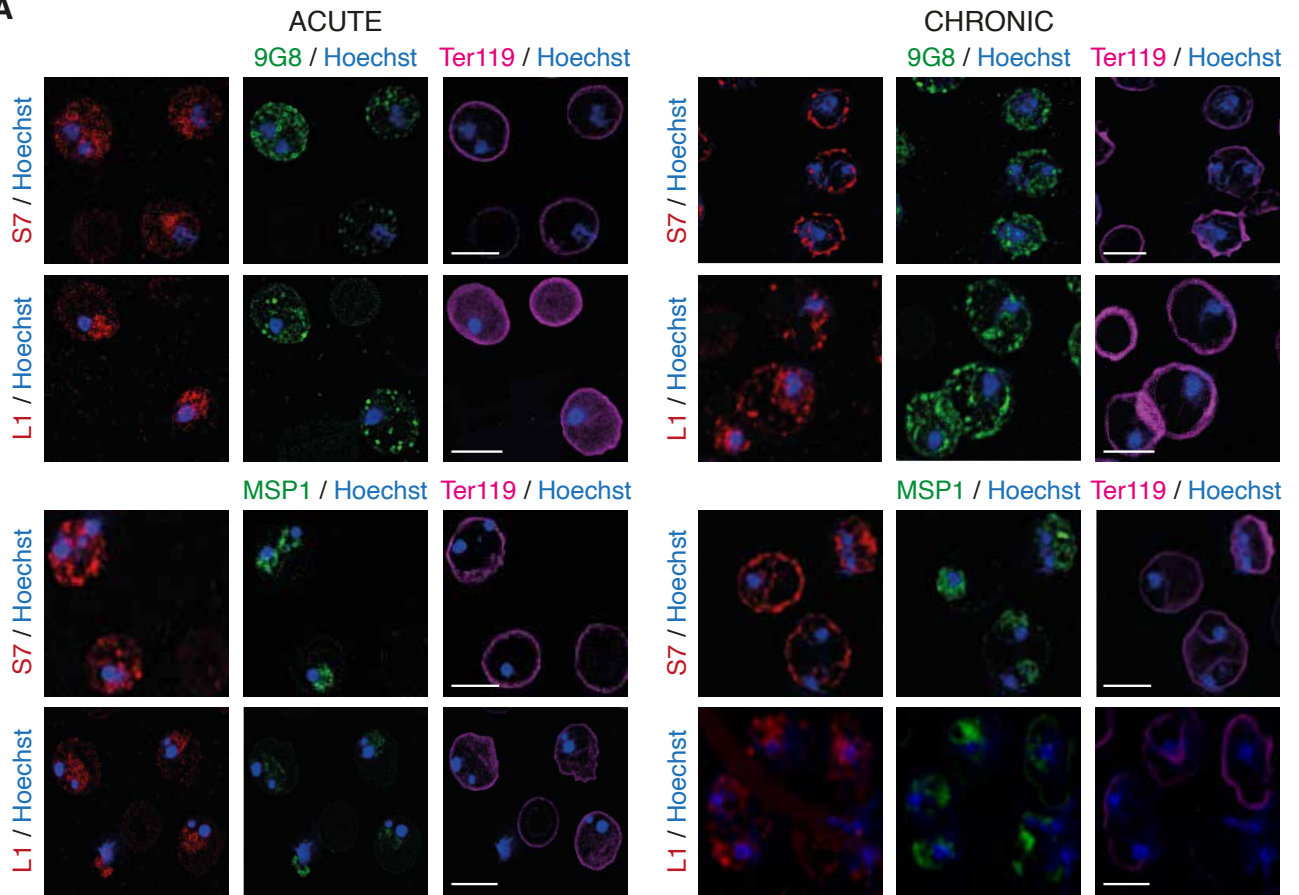**B**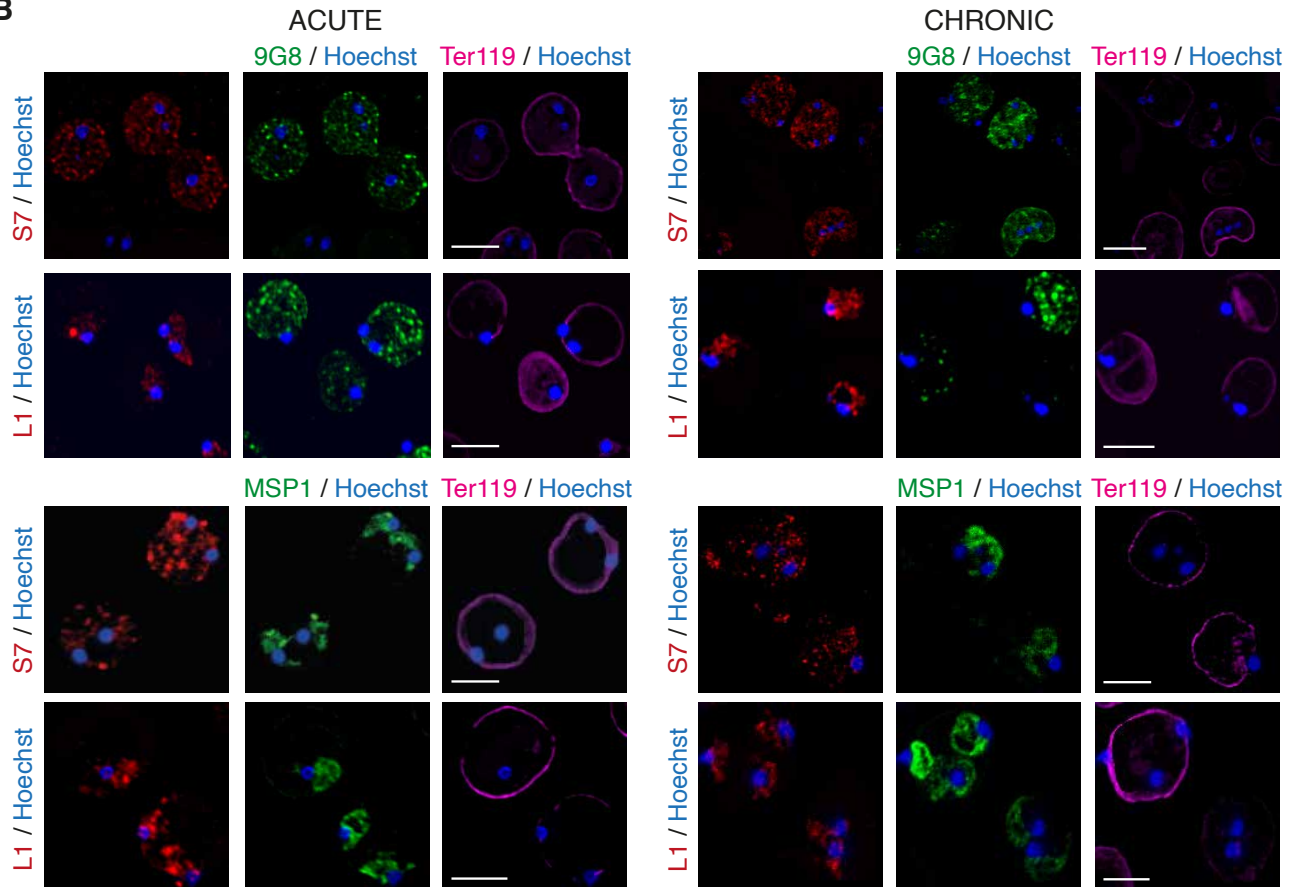

**Supplementary Figure S2. Subcellular localisation of S7 and L1 PIRs in the late trophozoite-stage of MT and SBP *P. c. chabaudi* AS parasites, during the acute- and chronic-phases of infection.** Single colour immunofluorescence images of MT (A) and SBP (B) WT *P. chabaudi* parasites at the late trophozoite-stage, isolated from C57Bl/6 RAG1<sup>-/-</sup> mouse blood. Parasites were primarily stained with the anti-S7 or anti-L1 peptide sera (red), and later with the anti-clone 6 (9G8) or anti-MSP1 monoclonal antibodies (green). The RBC surface membrane was stained with the rat anti-Ter119 monoclonal antibody (magenta), and parasite nuclei were stained with Hoechst (blue). Images were taken from confocal sections of acetone:methanol fixed parasites at X630 magnification. Scale bar length corresponds to 5 µm.

**A**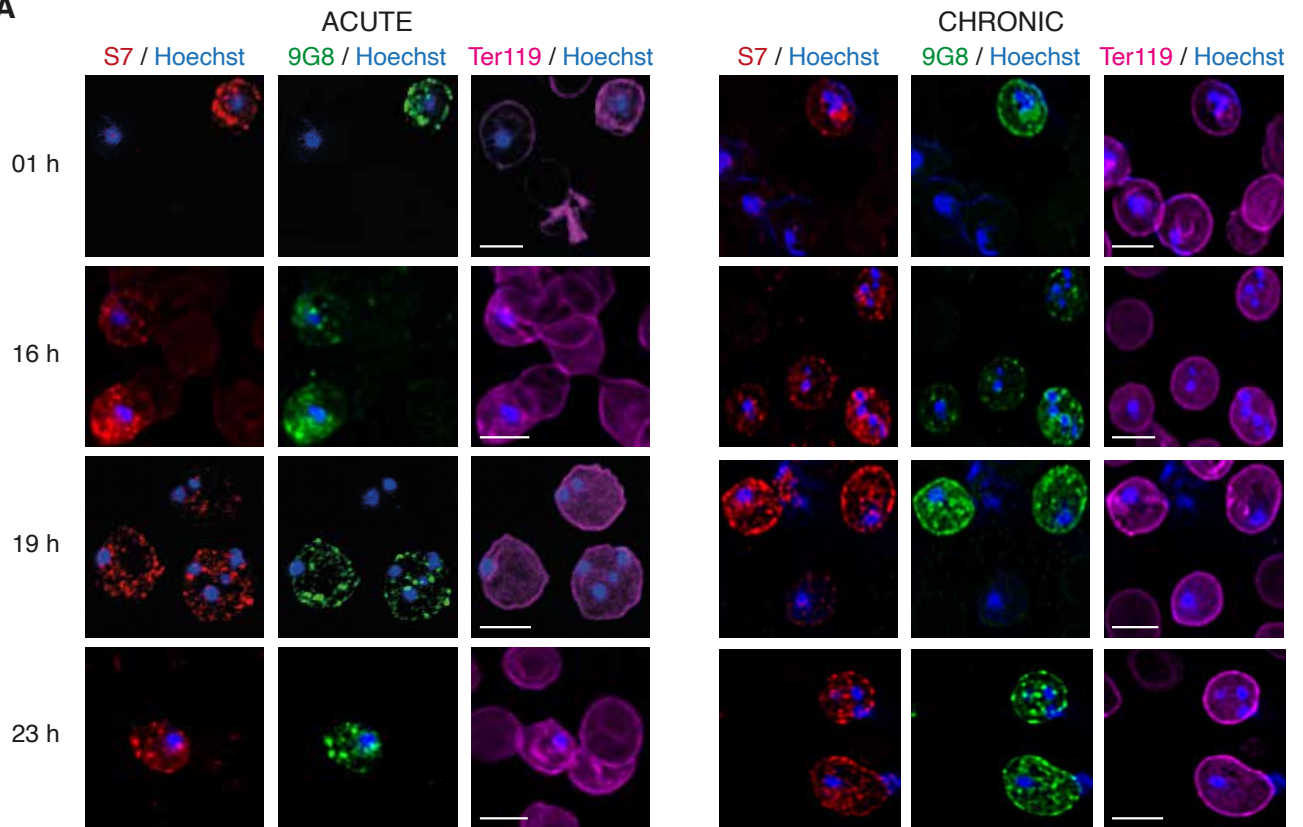**B**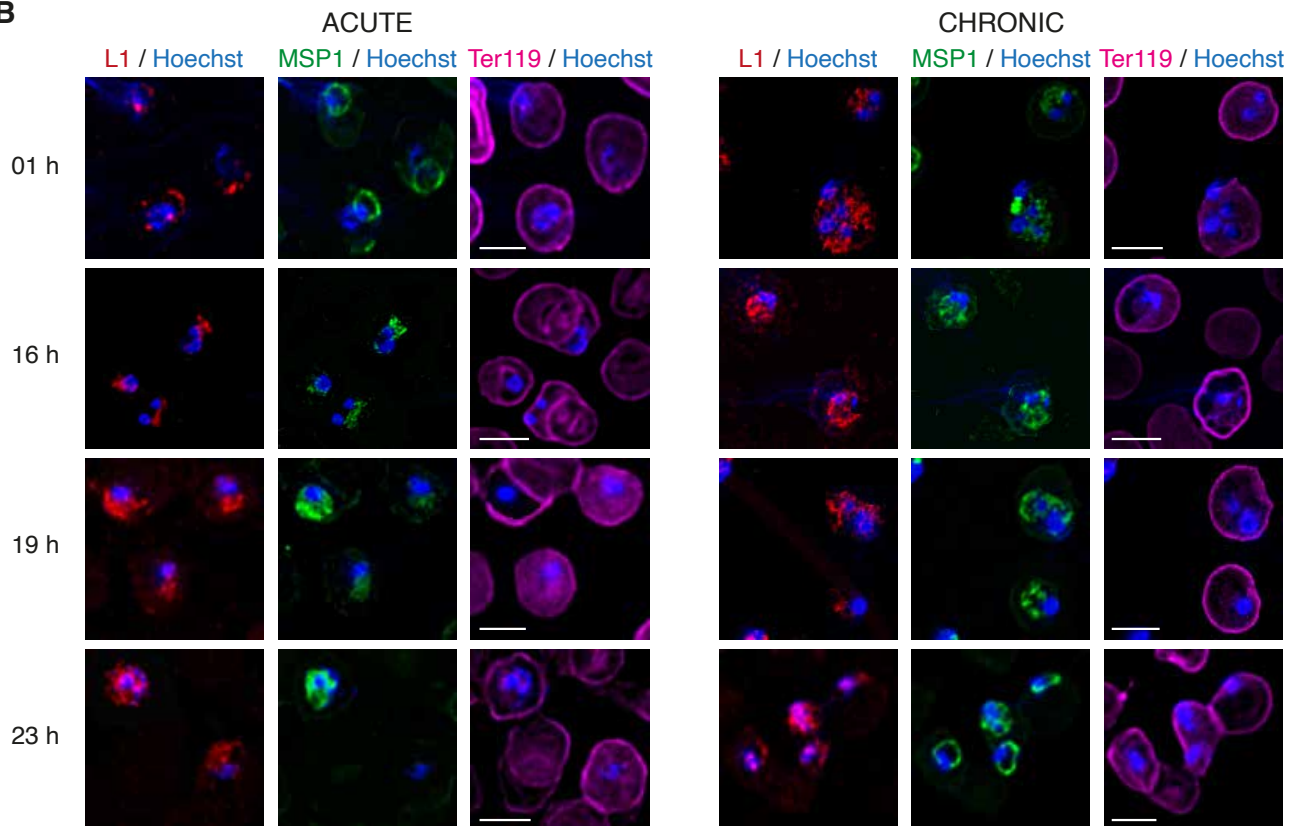

**Supplementary Figure S3. Localisation pattern of S7 and L1 PIRs across the 24-hour asexual blood cycle of MT *P. c. chabaudi AS* parasites, during acute- and chronic-phases of infection.**

Single colour immunofluorescence images of MT WT *P. chabaudi* parasites. WT mice were directly exposed to infected mosquitoes and following infection establishment, parasites at the acute- (day-7 post infection) or chronic-phase (day-45 post infection) of infection were passaged into RAG1<sup>-/-</sup> mice, from which blood tail smears were prepared at the ring (01 h), early trophozoite (16 h), mature trophozoite (19 h), and late trophozoite/schizont (23 h) developmental stages. Parasites were primarily stained with anti-S7 (**A**) or anti-L1 peptide sera (**B**) (red). S7-incubated slides were then probed with the anti-clone 6 (9G8) (green) antibody, whereas L1-incubated slides were probed with the anti-MSP1 monoclonal antibody (green). The RBC surface membrane was stained with an anti-Ter119 antibody (magenta) and parasite nuclei were stained with Hoechst (blue). Images were taken from confocal sections of acetone:methanol fixed parasites at X630 magnification. Scale bar length correspond to 5  $\mu\text{m}$ .

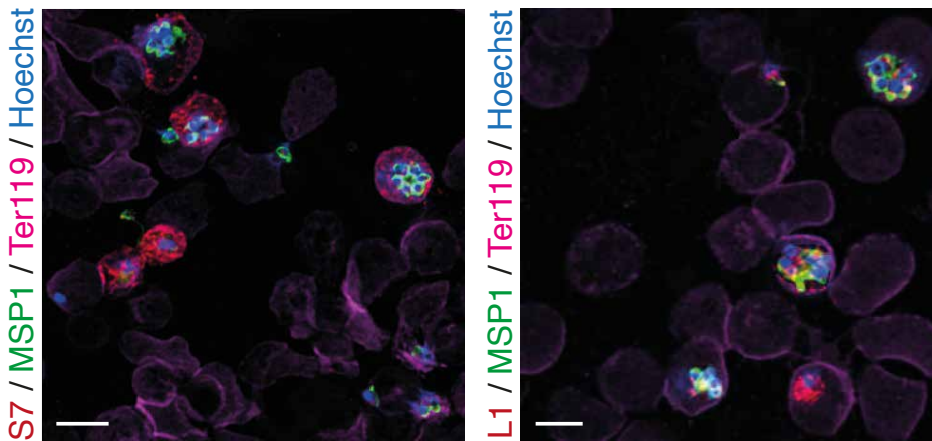

**Supplementary Figure S4. Localisation pattern of S7 and L1 PIRs in *in vitro* SBP acute-stage *P. c. chabaudi* AS schizonts.** Immunofluorescence assays of SBP acute-stage WT *P. chabaudi* parasites. Parasites were primarily stained with anti-S7 (left panel) or anti-L1 peptide sera (right panel) (red). S7- and L1-incubated slides were then probed against MSP1 (green), a prominent PVM protein. The RBC surface membrane was stained with an anti-Ter119 antibody (magenta) and parasite nuclei were stained with Hoechst (blue). Blood smears from *in vitro* schizont cultures were prepared following culture for five hours. Images were taken from confocal sections of acetone:methanol fixed parasites at X630 magnification. Scale bar length correspond to 5  $\mu$ m. SBP; Serially Blood Passage.

### ACUTE (S7, L1)

Replicate 1

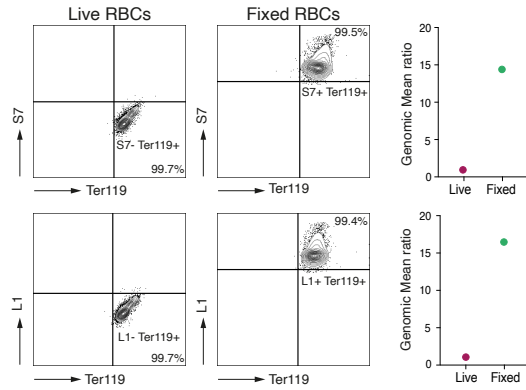

Replicate 2

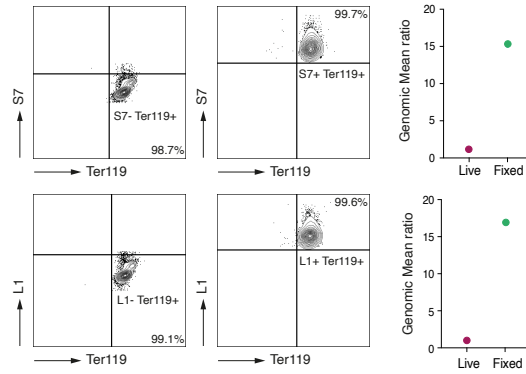

Replicate 3

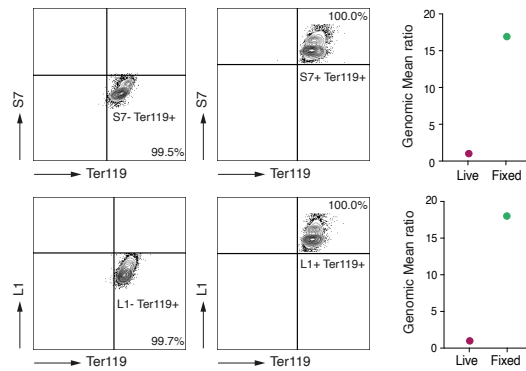

### CHRONIC (S7, L1)

Replicate 1

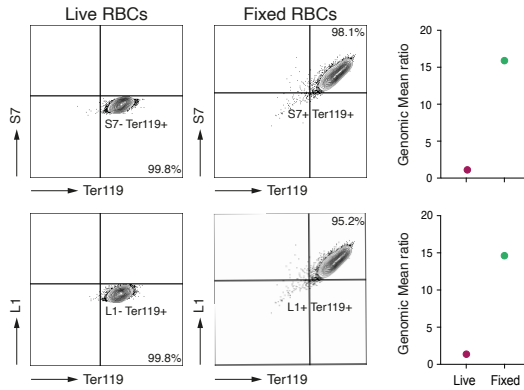

Replicate 2

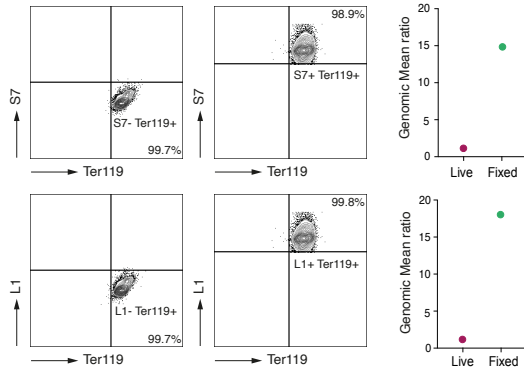

Replicate 3

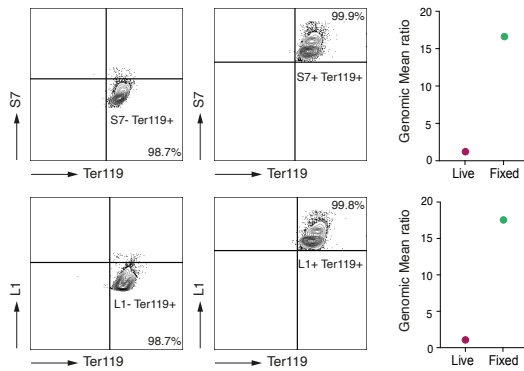

### CHRONIC (control)

Replicate 1

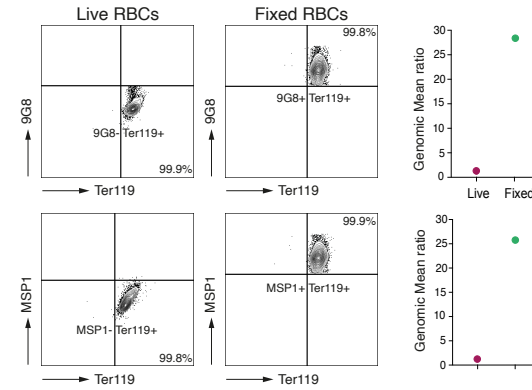

Replicate 2

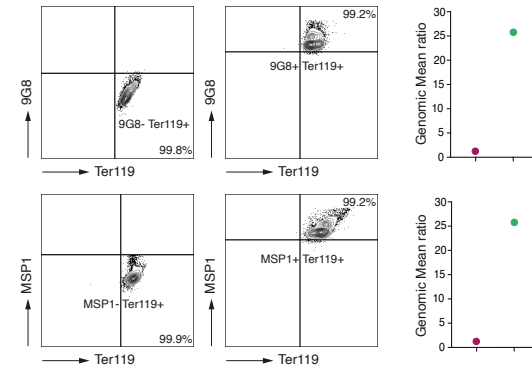

Replicate 3

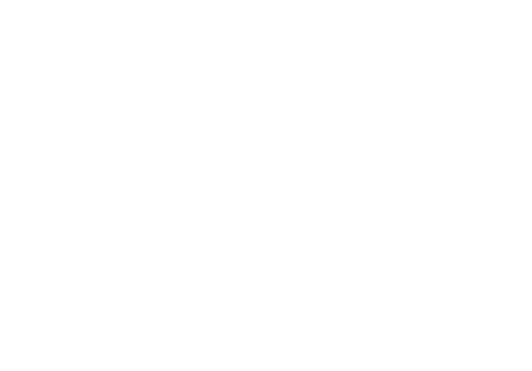



**Supplementary Figure S5. Contour plots of each individual replicate of the flow cytometric analysis performed on live and acetone:methanol fixed (control) *P. c. chabaudi* AS iRBC, following labelling with the anti-S7 or anti-L1 peptide antisera.** Labelling with the 9G8 or anti-MSP1 monoclonal antibodies was used as a negative control for labelling integral parasite proteins in live cells, and as a positive control for staining integral parasite proteins in fixed/permeabilised cells. Erythrocytes were also stained with anti-Ter119, a monoclonal antibody that targets an abundant RBC membrane protein. One experiment with 3 mice per group for the anti-L1/anti-S7 labelling of acute and chronic parasitised iRBC, and 2 mice per group for the 9G8/anti-MSP1 labelling of chronic-phase parasitised iRBC was conducted. The side plots indicate the ratio of the geometric mean fluorescence intensity detected following binding of the anti-S7 or anti-L1 antibodies on Hoechst+ and Hoechst-live and fixed (control) RBC, for each individual replicate.

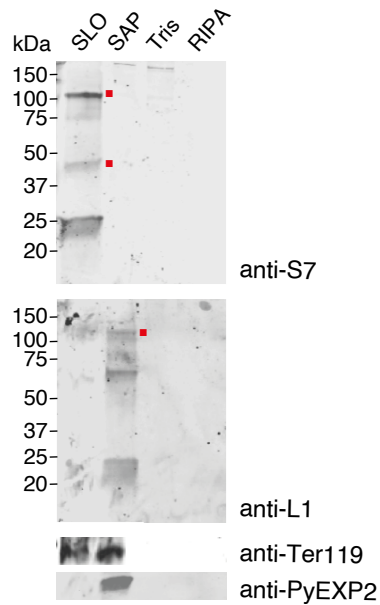

**Supplementary Figure S6. Western blot analysis of fractionated protein samples of *P. chabaudi* SBP acute-phase parasites at the trophozoite-stage.** Red dots indicate the estimated average size of the monomers or dimers of each PIR clade (S7: 33-45kDa; L1: 70-151kDa). Antibodies against the mouse erythroid-specific marker Ter119 and *Plasmodium* EXP2 were also used as stage-specific controls as well as to assess the sample purity. Western blot sample preparation was carried out under reducing conditions. The molecular weights on the right indicate the positions to which size markers had migrated. SLO; Streptolysin-O fraction; SAP; Saponin fraction; Tris; Tris-HCl lysis.

**Supplementary Table S1. *P. chabaudi* PIR clade peptide motifs and BlastP results against clade members.** Two peptide motifs were identified for each clade (motif 1 and 2). The number of BlastP results out of the total number of proteins belonging to each clade is indicated.

| Clade / Motif | Sequence            | BlastP hits of peptide antisera against clade members |        |       |         |       |
|---------------|---------------------|-------------------------------------------------------|--------|-------|---------|-------|
|               |                     | L1                                                    | S1     | S3    | S7      | unk   |
| S7 Motif 1    | CEKCSKDAKEFVNKYNELN | 0                                                     | 6 (16) | 1 (3) | 37 (70) | 5 (5) |
| S7 Motif 2    | CHSYDEMISSAVLFF     | 0                                                     | 0      | 0     | 12 (70) | 0     |
| L1 Motif 1    | CKTNYERINALGAYLY    | 49 (82)                                               | 0      | 0     | 1 (70)  | 0     |
| L1 Motif 2    | ACTLLREVDAYFNNE     | 29 (82)                                               | 0      | 0     | 0       | 0     |

**Supplementary Table S2. *P. chabaudi* PIR proteins identified as reciprocal best hits of each motif designed against the S7 and L1 clades.** The percent identity (%) between the peptide motifs and each PIR protein is indicated (BlastP E-value <0.01), as well as in which clade each PIR protein belongs to and whether it is associated with the AAPL or ChAPL loci. Protein hits with more than 70% similarity to the raised peptide motifs and E-value < 0.01 have been marked with an asterisk.

|                   | Identity (%) | Clade | AAPL/ChAPL |
|-------------------|--------------|-------|------------|
| <b>S7 Motif 1</b> |              |       |            |
| PCHAS_0400300*    | 100          | S7    | AAPL       |
| PCHAS_0300200*    | 74           | S7    |            |
| PCHAS_0200015*    | 68           | S7    | AAPL       |
| PCHAS_0600200     | 58           | S7    |            |
| PCHAS_1371700     | 63           | S7    |            |
| PCHAS_0320300     | 63           | S7    |            |
| PCHAS_0627200     | 58           | S7    |            |
| PCHAS_1147521     | 58           | S7    |            |
| PCHAS_0300300     | 56           | S7    |            |
| PCHAS_0200005     | 58           | S7    |            |
| PCHAS_0115100     | 53           | S7    |            |
| PCHAS_0213861     | 53           | S7    |            |
| PCHAS_0400101     | 58           | S7    |            |
| PCHAS_0500200     | 58           | S7    |            |
| PCHAS_0732000     | 58           | S7    |            |
| PCHAS_0938341     | 63           | S7    |            |
| PCHAS_0320400     | 53           | S7    |            |
| PCHAS_0938200     | 58           | S7    |            |
| PCHAS_1147400     | 53           | S1    |            |
| PCHAS_1400300     | 53           | S1    |            |
| PCHAS_1401300     | 92           | S1    |            |
| PCHAS_0800051     | 58           | S1    |            |
| PCHAS_1371400     | 53           | S7    | AAPL       |
| PCHAS_0300800     | 53           | S7    |            |
| PCHAS_1147500     | 47           | S7    |            |
| PCHAS_0320000     | 53           | S7    | AAPL       |
| PCHAS_0400200     | 53           | S7    | AAPL       |
| PCHAS_0900005     | 53           | S7    |            |
| PCHAS_0400400     | 58           | S7    | AAPL       |
| PCHAS_1371600     | 58           | S7    | AAPL       |
| PCHAS_0100300     | 47           | S7    |            |
| PCHAS_0319700     | 53           | S7    | AAPL       |
| PCHAS_0900015     | 53           | S7    |            |
| PCHAS_1247500     | 53           | S7    |            |
| PCHAS_0700900     | 50           | S7    |            |
| PCHAS_1200400     | 47           | S7    | AAPL       |
| PCHAS_1300201     | 42           | S7    |            |
| PCHAS_0319800     | 47           | S7    | AAPL       |
| PCHAS_0731900     | 50           | S1    |            |
| PCHAS_0114300     | 53           | unk   |            |
| PCHAS_0207000     | 50           | unk   |            |

|                   |     |     |       |
|-------------------|-----|-----|-------|
| PCHAS_0900051     | 53  | unk |       |
| PCHAS_1406400     | 62  | unk |       |
| PCHAS_0405700     | 50  | unk |       |
| PCHAS_0700300     | 50  | S1  |       |
| PCHAS_0800005     | 50  | S7  |       |
| PCHAS_1400400     | 50  | S1  |       |
| PCHAS_0115300     | 50  | S7  |       |
| PCHAS_0525421     | 50  | S3  |       |
| PCHAS_1371200     | 47  | S7  | AAPL  |
|                   |     |     |       |
| <b>S7 Motif 2</b> |     |     |       |
| PCHAS_0400300*    | 100 | S7  | AAPL  |
| PCHAS_0731800     | 67  | S7  |       |
| PCHAS_0319700     | 73  | S7  | AAPL  |
| PCHAS_0200025     | 80  | S7  | AAPL  |
| PCHAS_1200700     | 67  | S7  | AAPL  |
| PCHAS_0300800     | 53  | S7  |       |
| PCHAS_0525411     | 67  | S7  |       |
| PCHAS_1371200     | 67  | S7  | AAPL  |
| PCHAS_1000400     | 67  | S7  |       |
| PCHAS_0701300     | 53  | S7  |       |
| PCHAS_0731600     | 59  | S7  |       |
| PCHAS_0115300     | 62  | S7  |       |
|                   |     |     |       |
| <b>L1 Motif 1</b> |     |     |       |
| PCHAS_0601600*    | 88  | L1  |       |
| PCHAS_1146000*    | 88  | L1  |       |
| PCHAS_0900100*    | 88  | L1  |       |
| PCHAS_1302800*    | 75  | L1  |       |
| PCHAS_1467900*    | 81  | L1  |       |
| PCHAS_0800055*    | 81  | L1  |       |
| PCHAS_0837200*    | 81  | L1  |       |
| PCHAS_1001100*    | 81  | L1  |       |
| PCHAS_0420700*    | 81  | L1  |       |
| PCHAS_1467700*    | 75  | L1  |       |
| PCHAS_0213821*    | 81  | L1  |       |
| PCHAS_0700700*    | 75  | L1  |       |
| PCHAS_0731500*    | 81  | L1  |       |
| PCHAS_0113300*    | 73  | L1  |       |
| PCHAS_0200055*    | 73  | L1  |       |
| PCHAS_0900031*    | 75  | L1  |       |
| PCHAS_1100300*    | 75  | L1  |       |
| PCHAS_0601000     | 63  | L1  | ChAPL |
| PCHAS_1248300     | 69  | L1  |       |
| PCHAS_0626800     | 67  | L1  | ChAPL |
| PCHAS_1401400     | 63  | L1  |       |
| PCHAS_0400800     | 69  | L1  |       |
| PCHAS_0500400     | 73  | L1  |       |
| PCHAS_0837800     | 69  | L1  |       |

|                   |     |    |       |
|-------------------|-----|----|-------|
| PCHAS_1468600     | 63  | L1 |       |
| PCHAS_0100400     | 75  | L1 |       |
| PCHAS_0600800     | 56  | L1 | ChAPL |
| PCHAS_0700400     | 80  | L1 |       |
| PCHAS_1301700     | 63  | L1 |       |
| PCHAS_0301700     | 60  | L1 | ChAPL |
| PCHAS_0800035     | 50  | L1 |       |
| PCHAS_0200035     | 63  | L1 |       |
| PCHAS_0701700     | 50  | L1 |       |
| PCHAS_1000600     | 50  | L1 |       |
| PCHAS_1370900     | 63  | L1 |       |
| PCHAS_0419900     | 67  | L1 |       |
| PCHAS_0601100     | 67  | L1 | ChAPL |
| PCHAS_0301400     | 60  | L1 | ChAPL |
| PCHAS_0419800     | 67  | L1 |       |
| PCHAS_0700600     | 67  | L1 |       |
| PCHAS_1147000     | 63  | L1 |       |
| PCHAS_1302200     | 67  | L1 |       |
| PCHAS_0114900     | 67  | L1 |       |
| PCHAS_0300700     | 63  | L1 |       |
| PCHAS_0302000     | 50  | S7 | ChAPL |
| PCHAS_1300601     | 67  | L1 |       |
| PCHAS_0301900     | 60  | L1 | ChAPL |
| PCHAS_0626500     | 50  | L1 | ChAPL |
| PCHAS_0626600     | 67  | L1 | ChAPL |
| PCHAS_1370300     | 56  | L1 |       |
|                   |     |    |       |
| <b>L1 Motif 2</b> |     |    |       |
| PCHAS_1100300*    | 100 | L1 |       |
| PCHAS_0213821*    | 93  | L1 |       |
| PCHAS_0100400*    | 86  | L1 |       |
| PCHAS_0837800     | 64  | L1 |       |
| PCHAS_0420700     | 73  | L1 |       |
| PCHAS_0800055     | 67  | L1 |       |
| PCHAS_0731500     | 60  | L1 |       |
| PCHAS_1401400     | 60  | L1 |       |
| PCHAS_0601600     | 64  | L1 |       |
| PCHAS_0837200     | 64  | L1 |       |
| PCHAS_1001100     | 64  | L1 |       |
| PCHAS_1146000     | 69  | L1 |       |
| PCHAS_1467900     | 64  | L1 |       |
| PCHAS_0700700     | 64  | L1 |       |
| PCHAS_1248300     | 64  | L1 |       |
| PCHAS_1301700     | 64  | L1 |       |
| PCHAS_1467700     | 60  | L1 |       |
| PCHAS_0400800     | 64  | L1 |       |
| PCHAS_0700400     | 57  | L1 |       |
| PCHAS_1302800     | 57  | L1 |       |
| PCHAS_0113300     | 60  | L1 |       |

|               |    |    |       |
|---------------|----|----|-------|
| PCHAS_0200035 | 57 | L1 |       |
| PCHAS_0500400 | 57 | L1 |       |
| PCHAS_0114800 | 57 | L1 |       |
| PCHAS_0900031 | 57 | L1 |       |
| PCHAS_1370900 | 57 | L1 |       |
| PCHAS_1302200 | 50 | L1 |       |
| PCHAS_0301600 | 47 | L1 | ChAPL |
| PCHAS_0419500 | 47 | L1 |       |
